# Supplementary material for: tBu4octapa-alkyl-NHS for metalloradiopeptide preparation
Source: Royal Society of Chemistry journal article supplement (doi:10.1039/d0dt00845a), 2020-01-01
Supplement: d0dt00845a1.pdf [file d0dt00845a1.pdf]

**Electronic Supplementary Information (ESI) for:**

**<sup>t</sup>Bu<sub>4</sub>octapa-alkyl-NHS for Metalloradiopeptide Preparation**

Lily Li<sup>a,b</sup>, Hsiou-Ting Kuo<sup>c</sup>, Xiaozhu Wang<sup>a</sup>, Helen Merkens<sup>c</sup>, Nadine Colpo<sup>c</sup>, Valery Radchenko<sup>b,d</sup>, Paul Schaffer<sup>b</sup>, Kuo-Shyan Lin<sup>c</sup>, François Bénard<sup>c</sup>, Chris Orvig<sup>a\*</sup>

<sup>a</sup> Medicinal Inorganic Chemistry Group, Department of Chemistry, University of British Columbia, 2036 Main Mall, Vancouver, British Columbia V6T 1Z1, Canada

<sup>b</sup> Life Sciences Division, TRIUMF, 4004 Wesbrook Mall, Vancouver, British Columbia V6T 2A3, Canada

<sup>c</sup> Department of Molecular Oncology, BC Cancer, 675 West 10<sup>th</sup> Ave, Vancouver, British Columbia V5Z 1L3, Canada

<sup>d</sup> Department of Chemistry, University of British Columbia, 2036 Main Mall, Vancouver, British Columbia V6T 1Z1, Canada

## **Contents**

|                                                                             |    |
|-----------------------------------------------------------------------------|----|
| <b>NMR Spectra</b> .....                                                    | 3  |
| <b>Mass Spectra</b> .....                                                   | 14 |
| <b>DFT calculations</b> .....                                               | 16 |
| <b>Radiolabeling, Human Serum Challenge and Lanthanum Competition</b> ..... | 18 |
| <b><i>Ex Vivo</i> Biodistribution Studies</b> .....                         | 20 |

## NMR Spectra

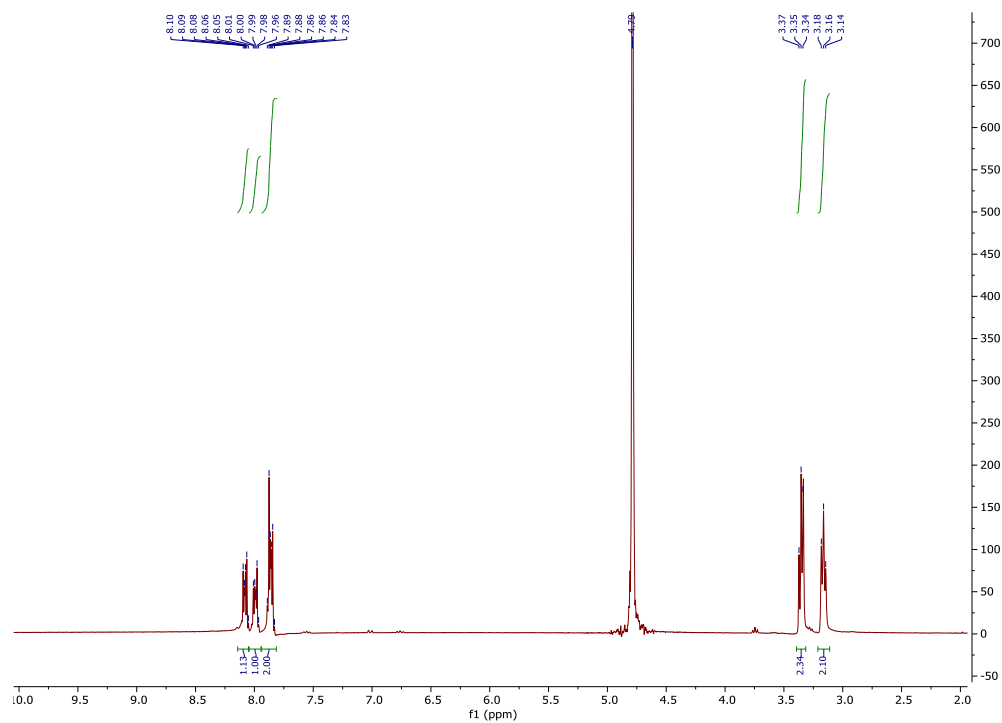

**Figure S1** Compound **1**  $^1\text{H}$  NMR spectrum (400 MHz, 298 K,  $\text{D}_2\text{O}$ ).

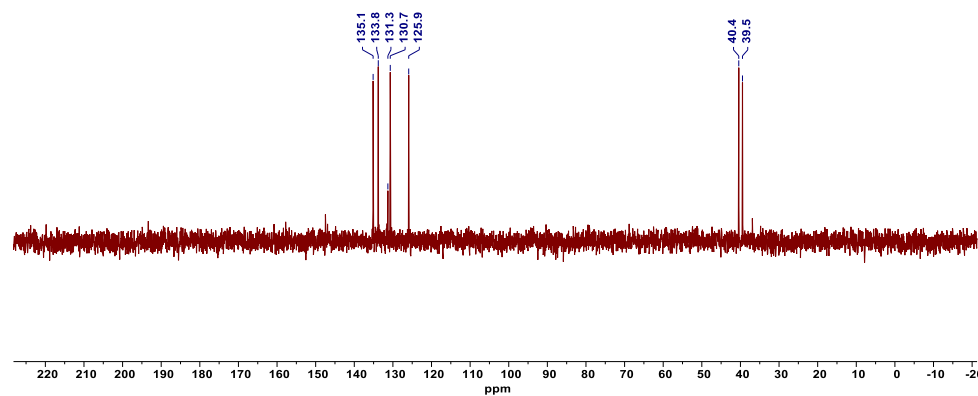

**Figure S2.** Compound **1**  $^{13}\text{C}$  NMR spectrum (100 MHz, 298 K,  $\text{D}_2\text{O}$ ).

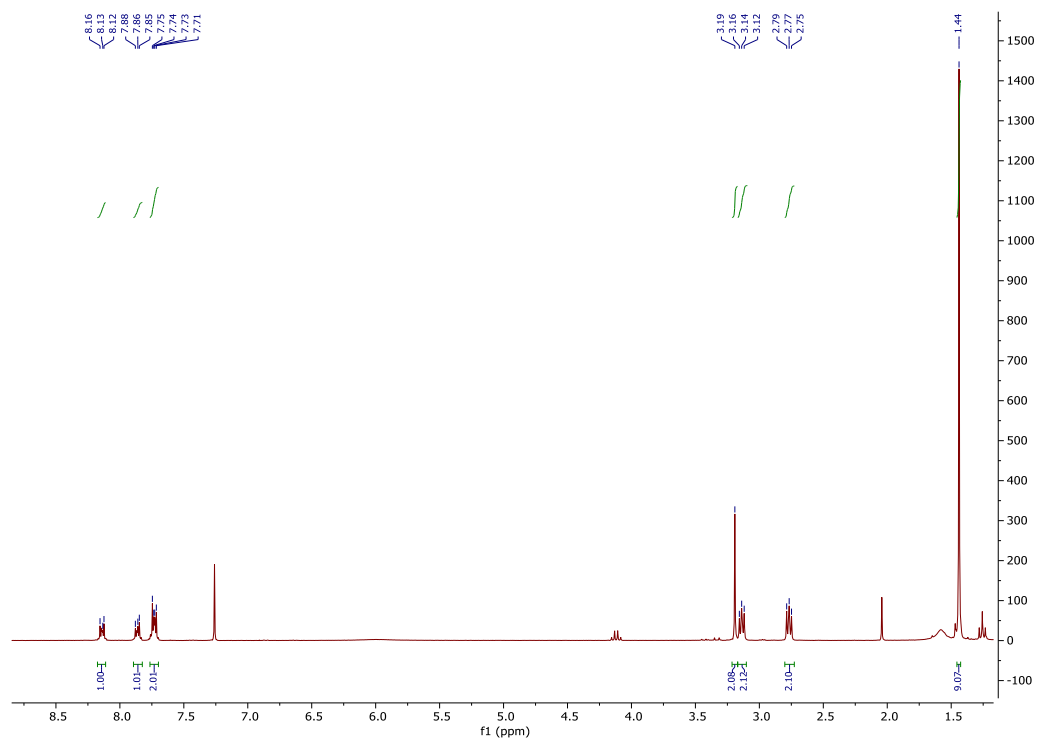

**Figure S3** Compound **2**  $^1\text{H}$  NMR spectrum (400 MHz, 298 K,  $\text{CDCl}_3$ ).

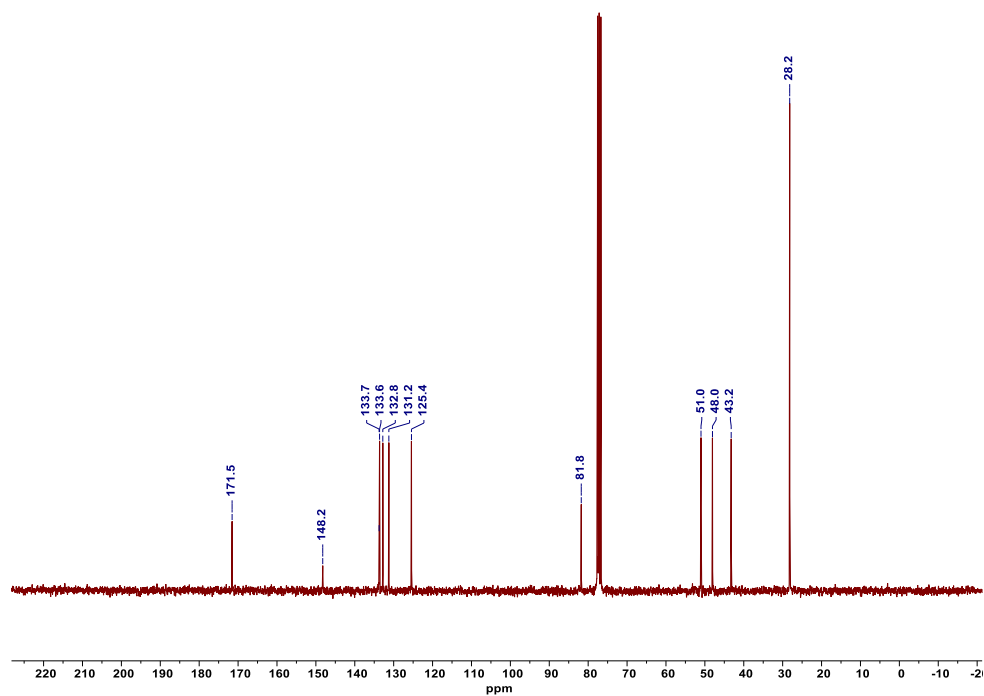

**Figure S4.** Compound **2**  $^{13}\text{C}$  NMR spectrum (100 MHz, 298 K,  $\text{CDCl}_3$ ).

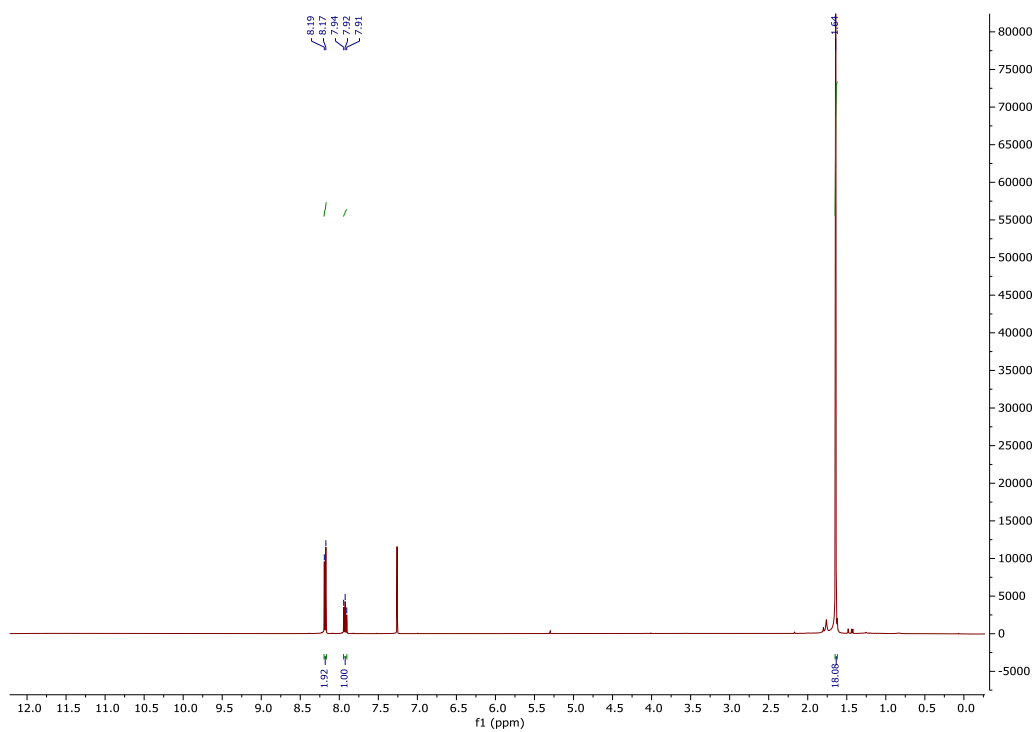

**Figure S5.** Compound 3  $^1\text{H}$  NMR spectrum (400 MHz, 298 K,  $\text{CDCl}_3$ ).

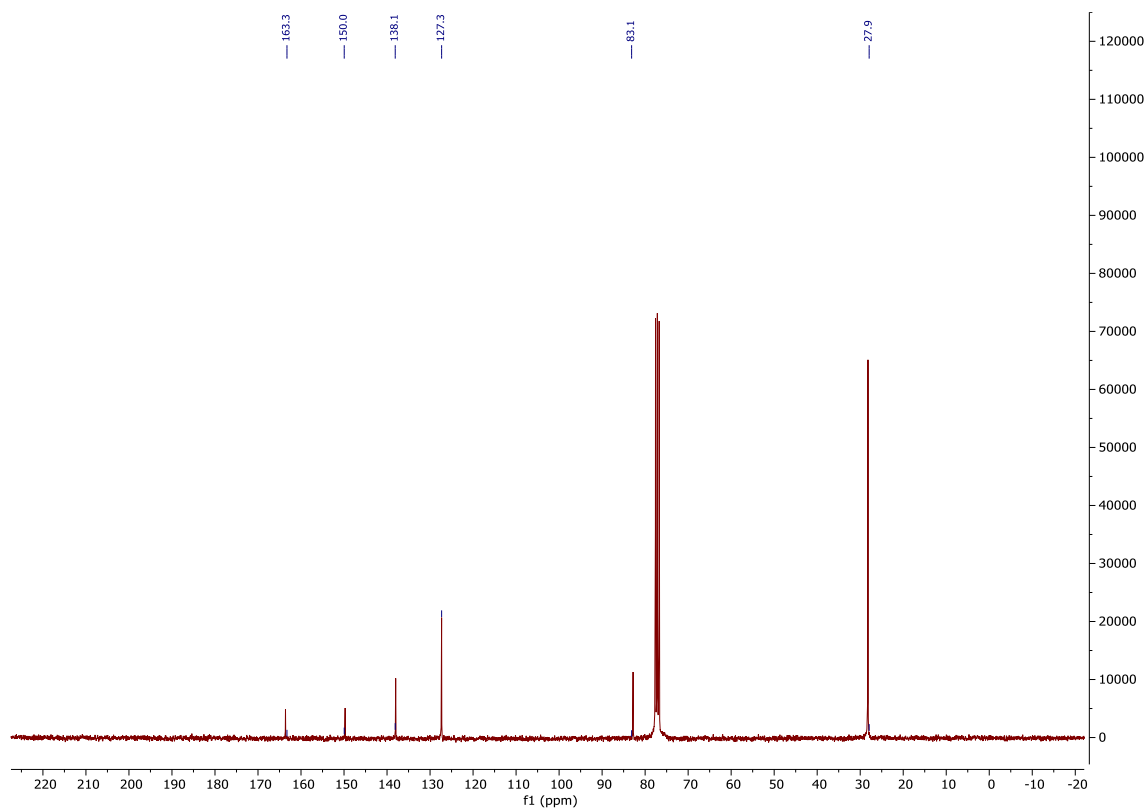

**Figure S6.** Compound 3  $^{13}\text{C}$  NMR spectrum (100 MHz, 298 K,  $\text{CDCl}_3$ ).

LL199

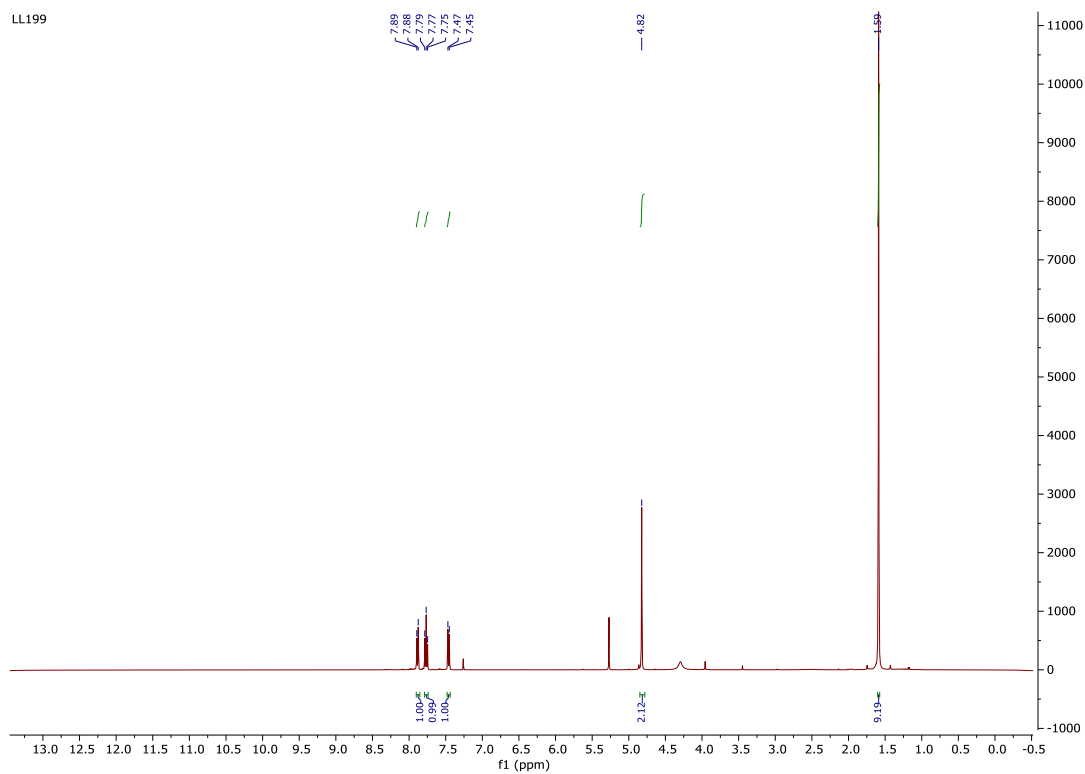

**Figure S7.** Compound 4 <sup>1</sup>H NMR spectrum (400 MHz, 298 K, CDCl<sub>3</sub>).

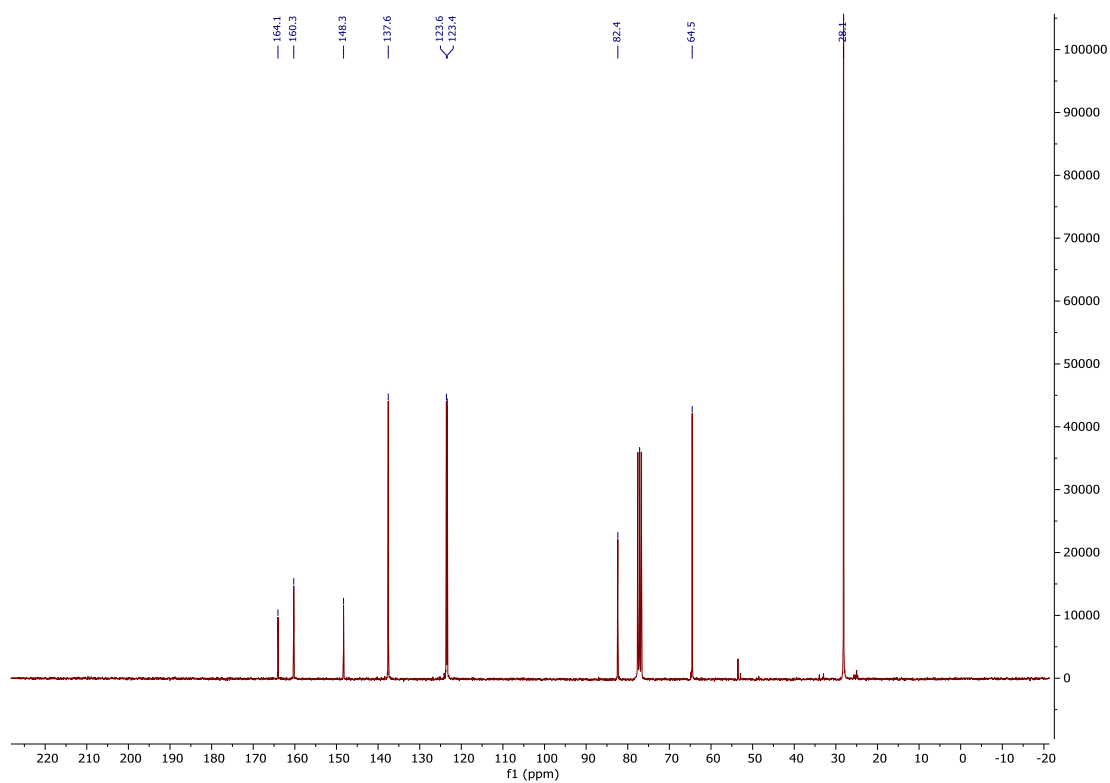

**Figure S8.** Compound 4 <sup>13</sup>C NMR spectrum (100 MHz, 298 K, CDCl<sub>3</sub>).

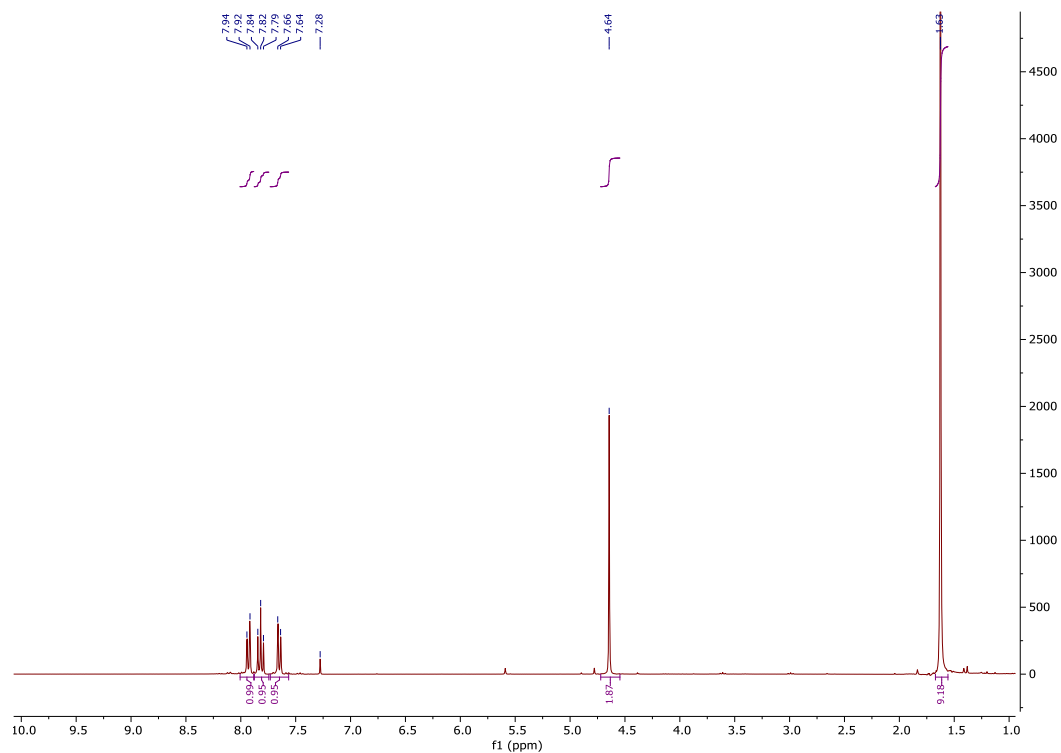

**Figure S9.** Compound **5**  $^1\text{H}$  NMR spectrum (400 MHz, 298 K,  $\text{CDCl}_3$ ).

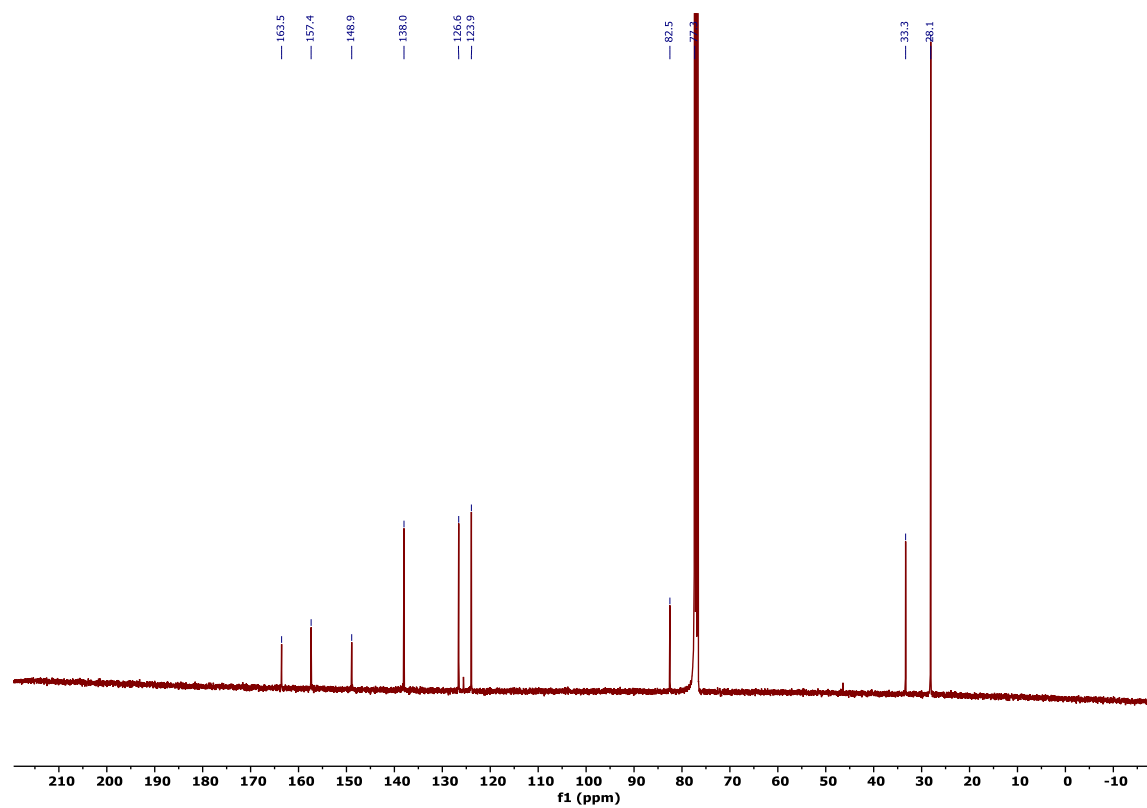

**Figure S10.** Compound **5**  $^{13}\text{C}$  NMR spectrum (100 MHz, 298 K,  $\text{CDCl}_3$ ).

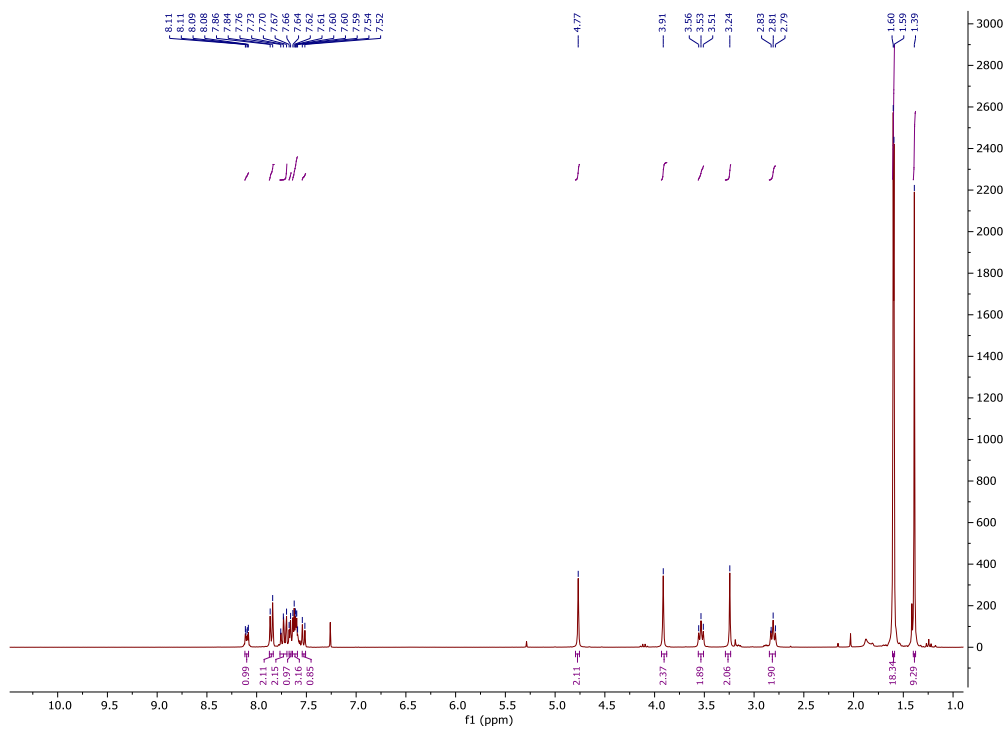

**Figure S11.** Compound **6**  $^1\text{H}$  NMR spectrum (400 MHz, 298 K,  $\text{CDCl}_3$ ).

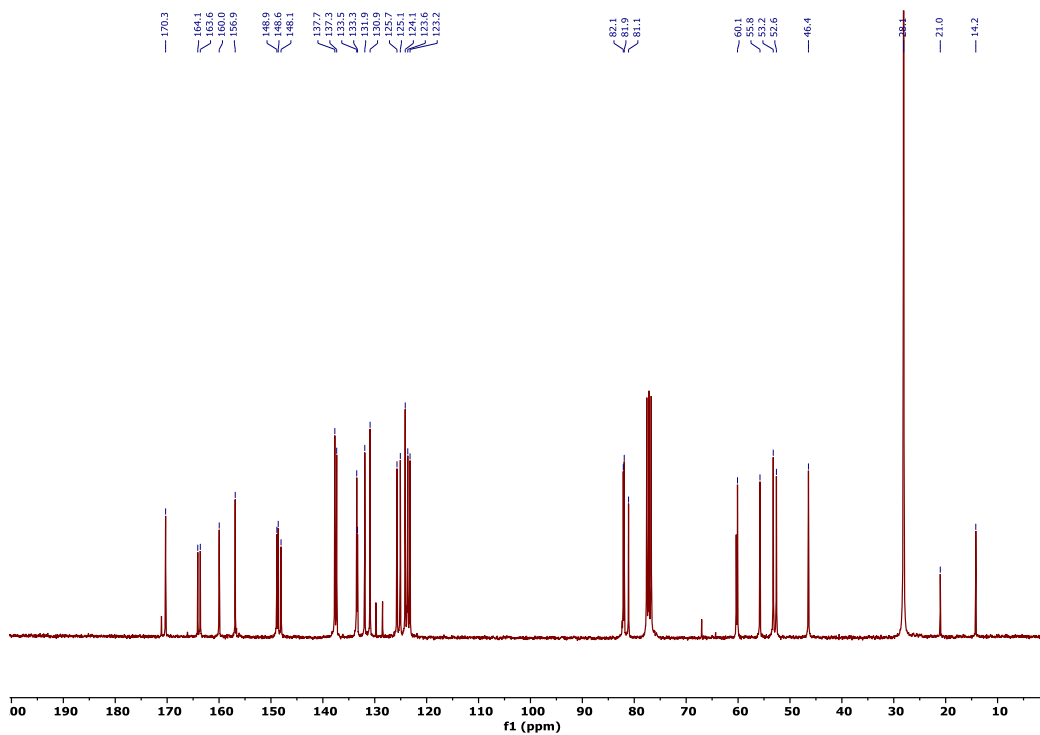

**Figure S12.** Compound **6**  $^{13}\text{C}$  NMR spectrum (100 MHz, 298 K,  $\text{CDCl}_3$ ).



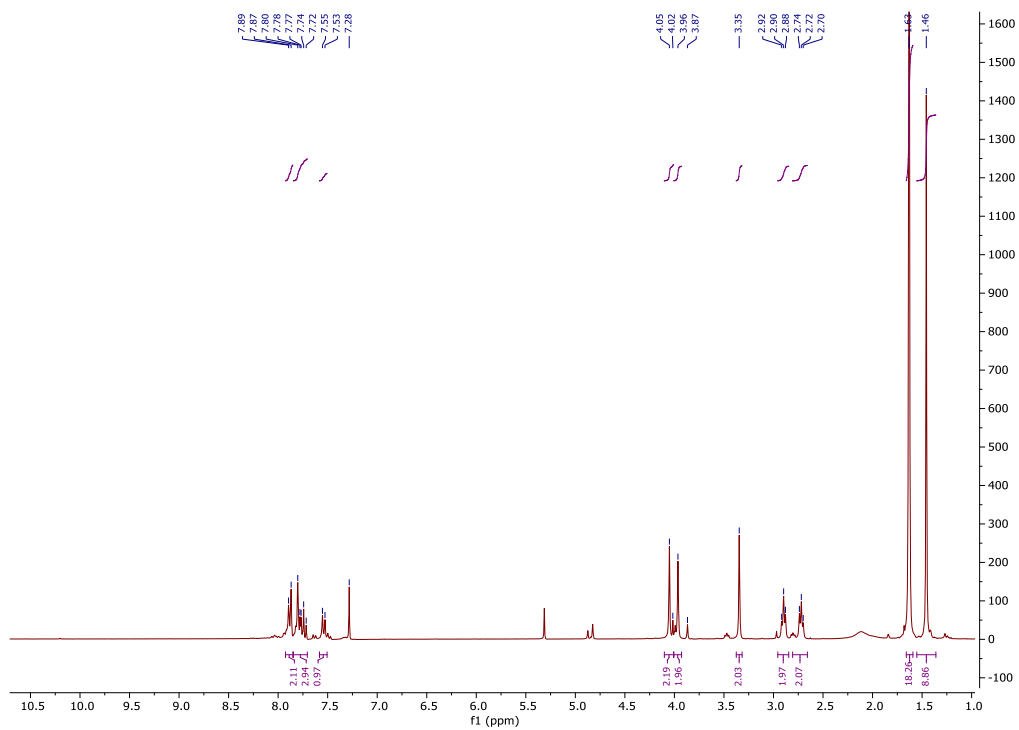

**Figure S13.** Compound 7  $^1\text{H}$  NMR spectrum (400 MHz, 298 K,  $\text{CDCl}_3$ ).

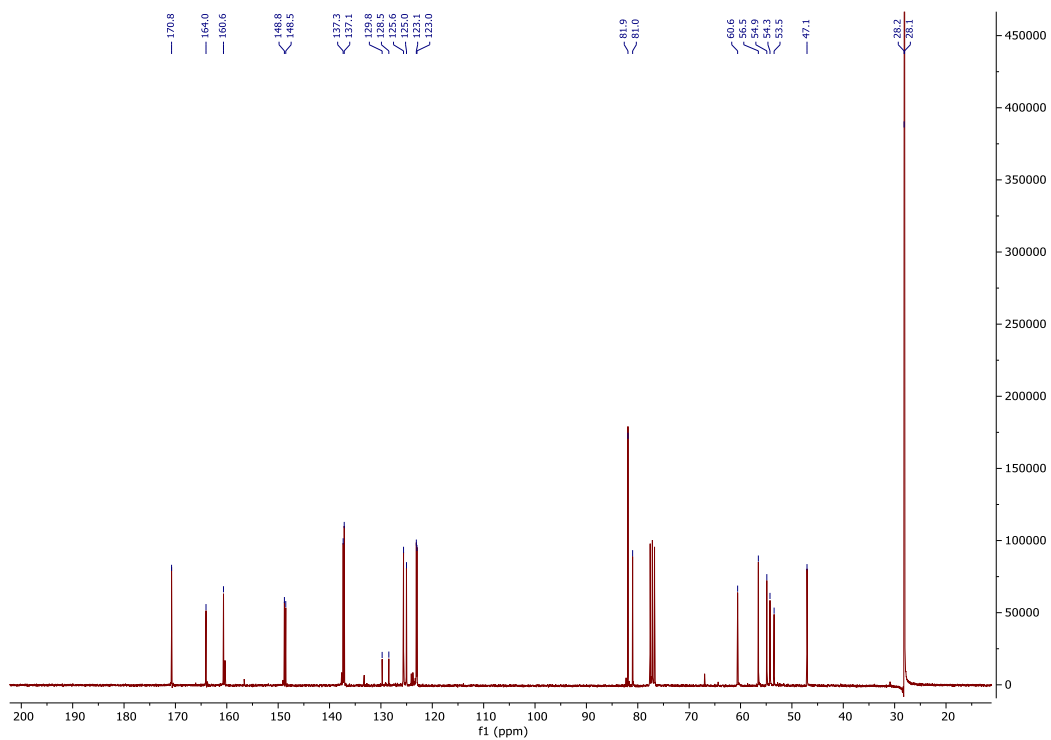

**Figure S14.** Compound 7  $^{13}\text{C}$  NMR spectrum (100 MHz, 298 K,  $\text{CDCl}_3$ ).

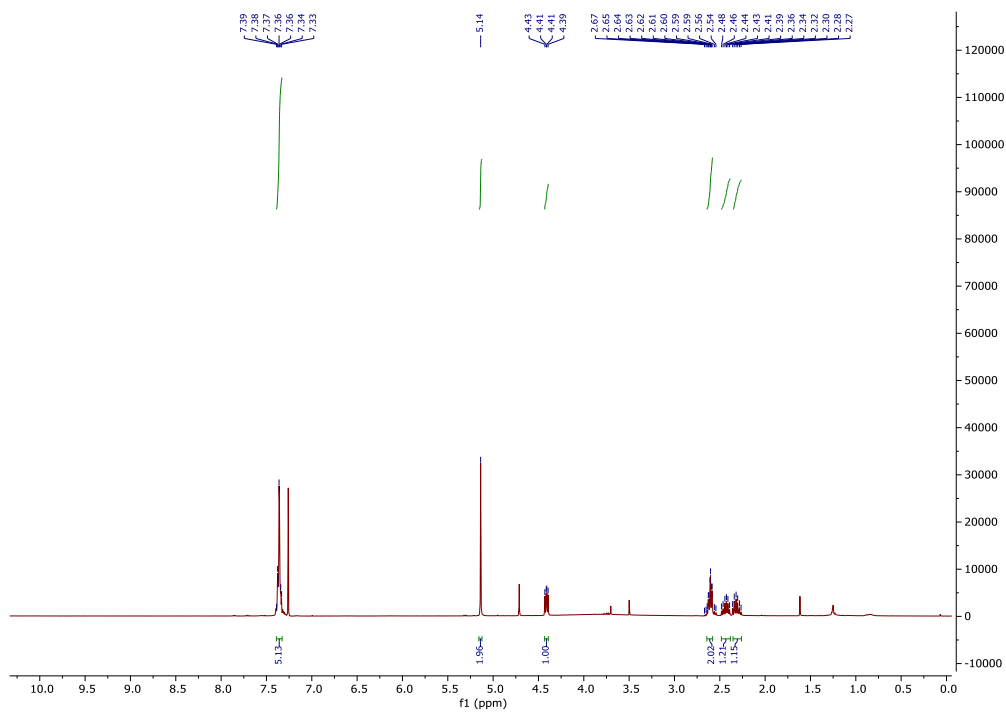

**Figure S15.** Compound **8**  $^1\text{H}$  NMR spectrum (400 MHz, 298 K,  $\text{CDCl}_3$ ).

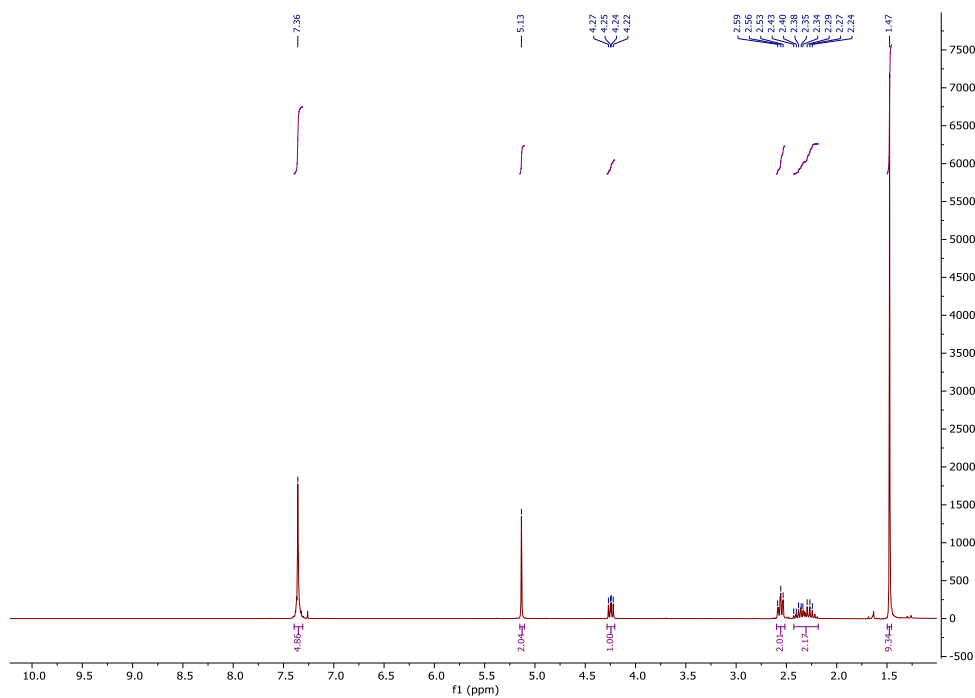

**Figure S16.** Compound **9**  $^1\text{H}$  NMR spectrum (400 MHz, 298 K,  $\text{CDCl}_3$ ).

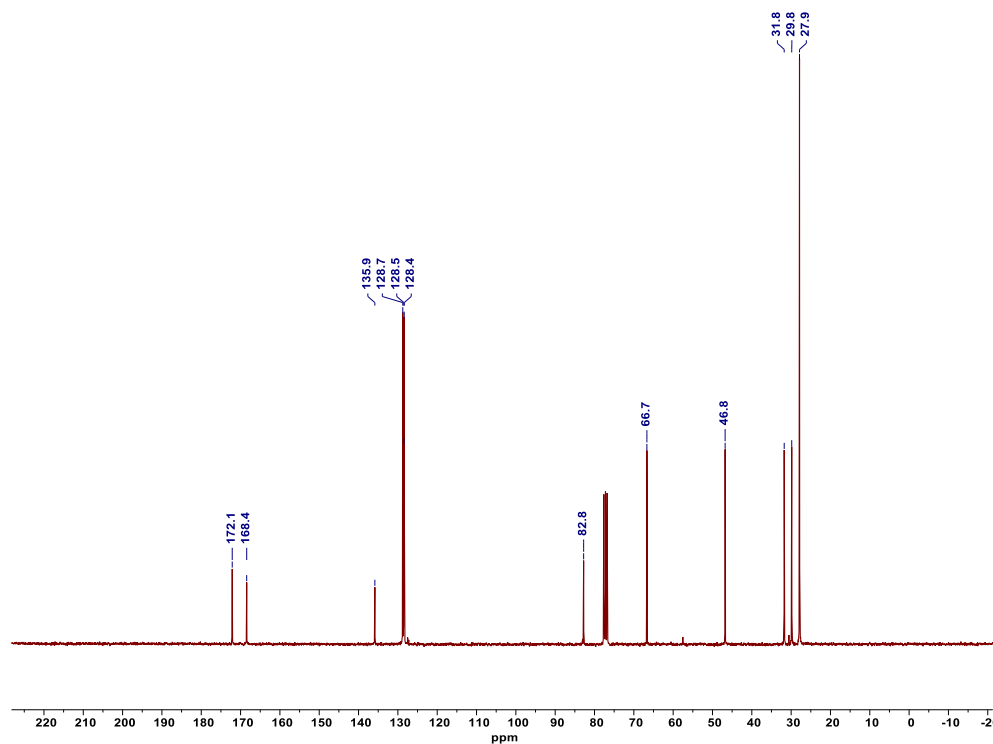

Figure S17. Compound 9 <sup>13</sup>C NMR spectrum (100 MHz, 298 K, CDCl<sub>3</sub>).

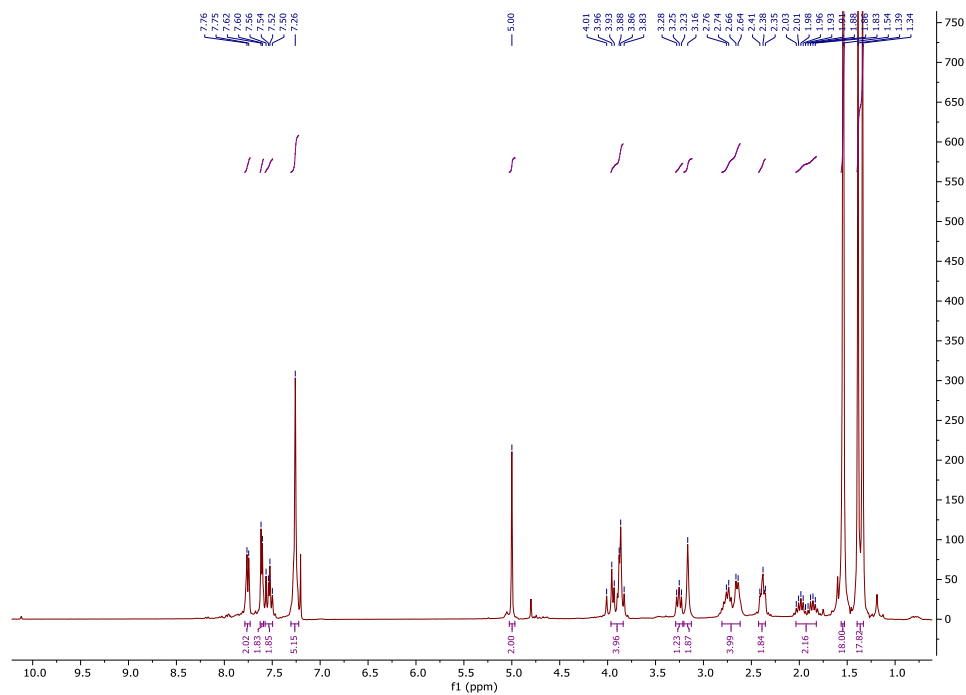

Figure S18. Compound 10 <sup>1</sup>H NMR spectrum (400 MHz, 298 K, CDCl<sub>3</sub>).

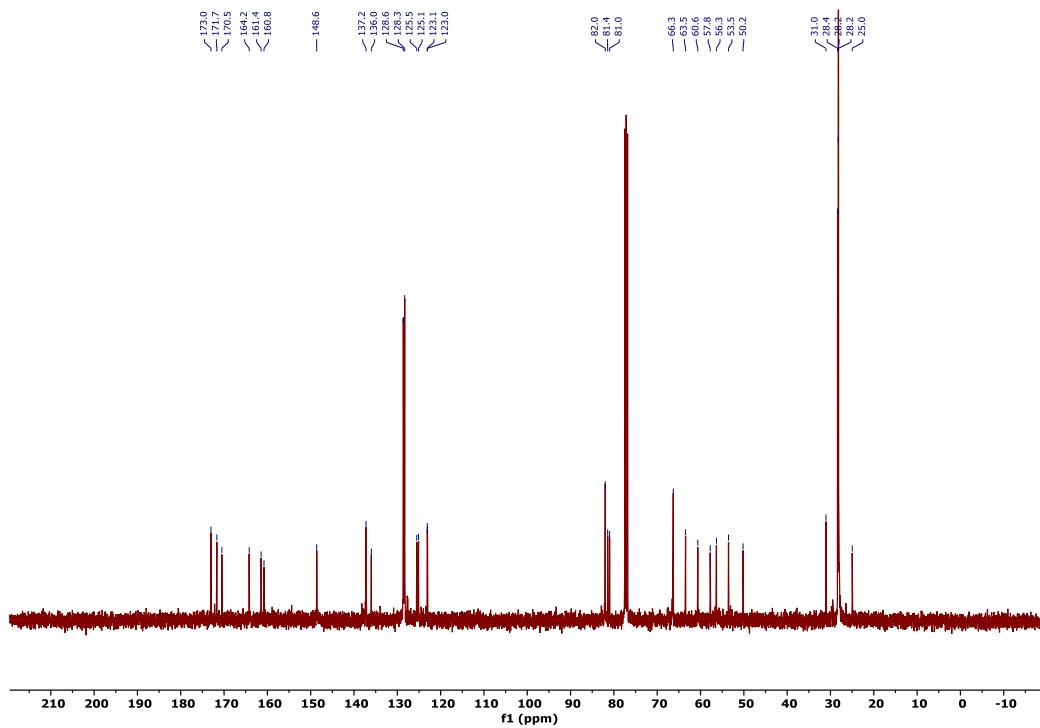

**Figure S19.** Compound **10**  $^{13}\text{C}$  NMR spectrum (100 MHz, 298 K,  $\text{CDCl}_3$ ).

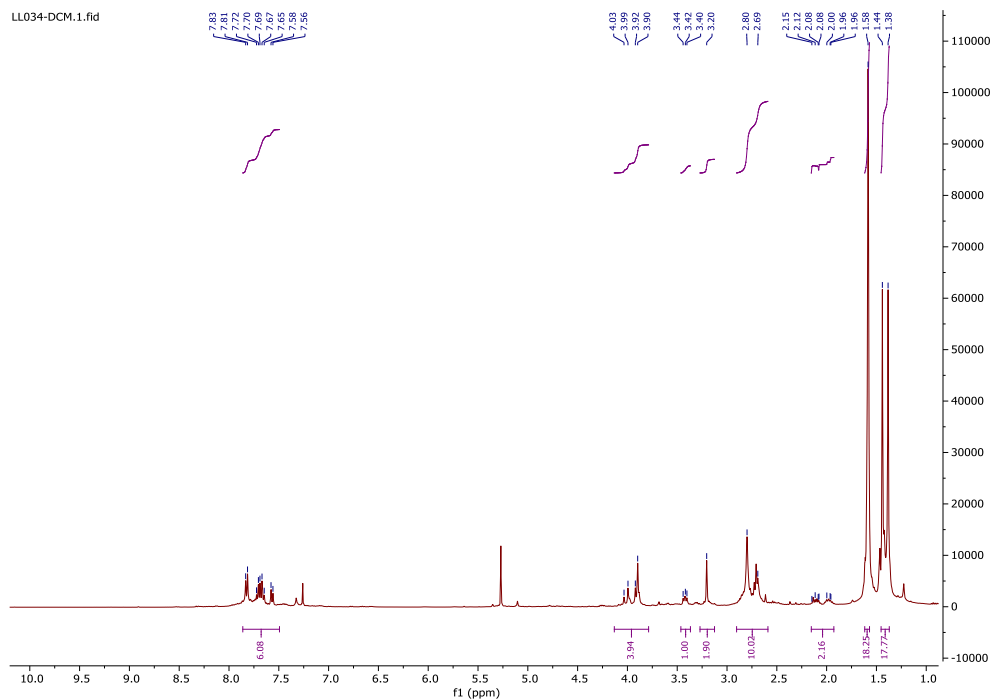

**Figure S20.** Compound **12**  $^1\text{H}$  NMR (400 MHz, 298 K,  $\text{CDCl}_3$ ).

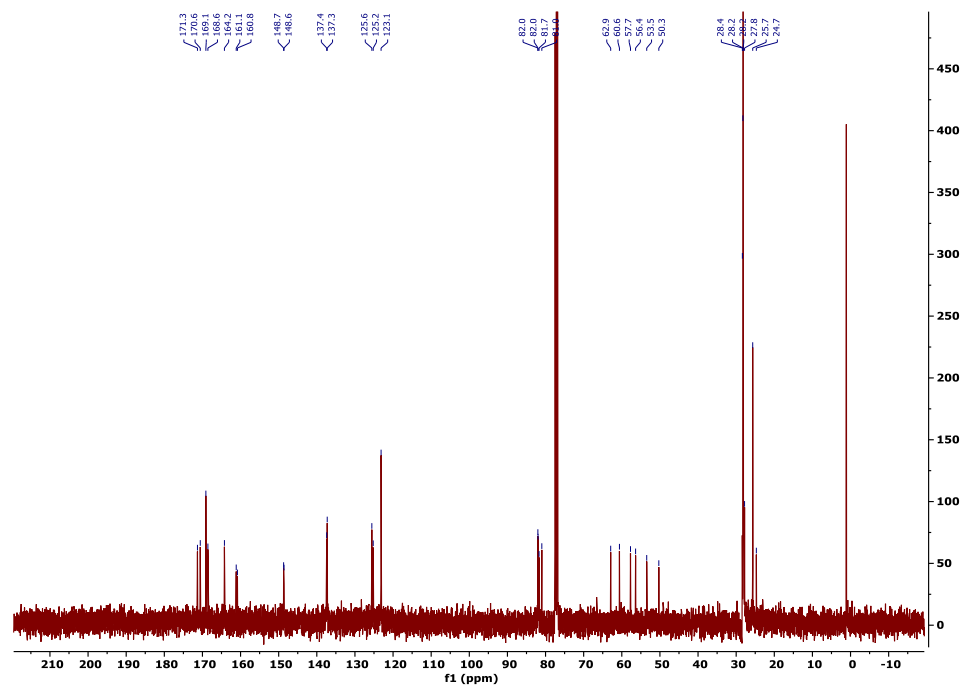

**Figure S21.** Compound **12**  $^{13}\text{C}$  NMR spectrum (100 MHz, 298 K,  $\text{CDCl}_3$ ).

## Mass Spectra

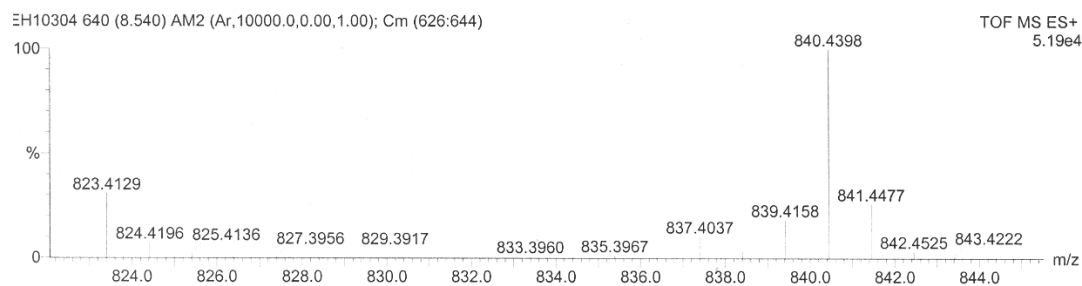

Figure S22.  $t\text{Bu}_4\text{octapa-alkyl-NHS}$  high-resolution mass spectrum.

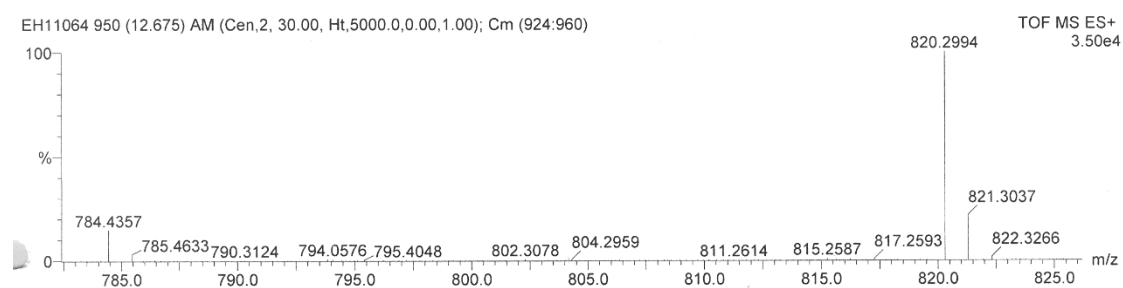

Figure S23.  $\text{H}_4\text{octapa-PSMA-ureido}$  high-resolution mass spectrum.

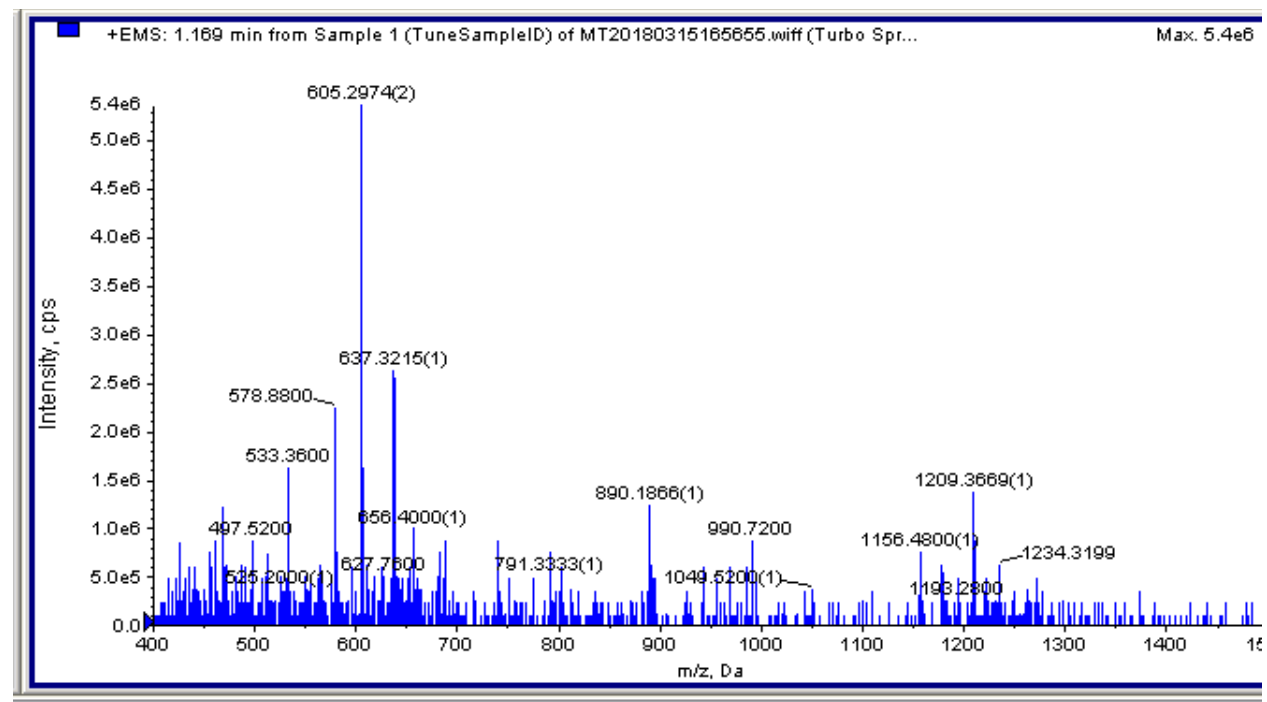

Figure S24.  $\text{H}_4\text{octapa-alkyl-PSMA617}$  high-resolution mass spectrum.

1: (Time: 1.20) Combine (33:50-(13:27+79:89))

3: MS ES-  
8.3e+004

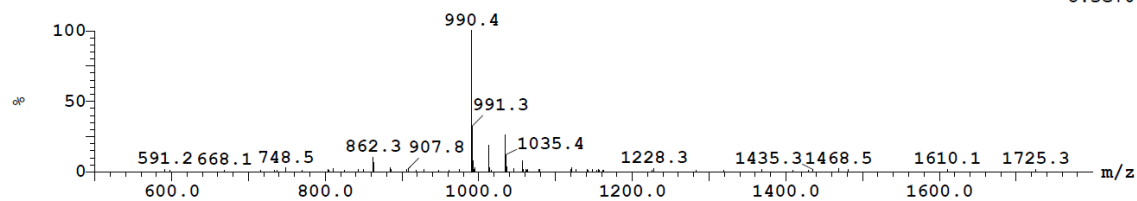

**Figure S25.** [<sup>nat</sup>Lu][Lu(octapa-alkyl-PSMA-ureido)] low-resolution mass spectrum.

1: (Time: 1.20) Combine (33:49-(13:26+79:89))

4: MS ES-  
3.6e+004

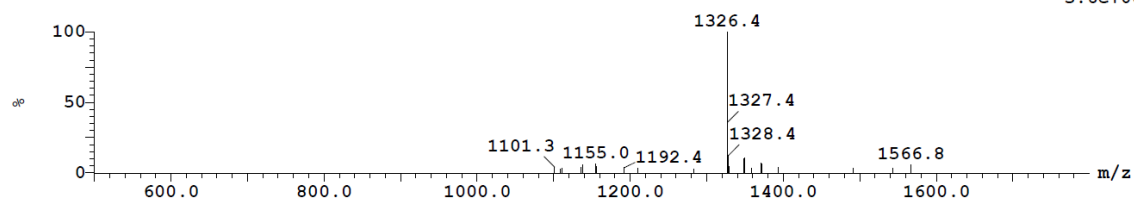

**Figure S26.** [<sup>nat</sup>Lu][Lu(octapa-alkyl-PSMA617)] low-resolution mass spectrum.

## DFT calculations

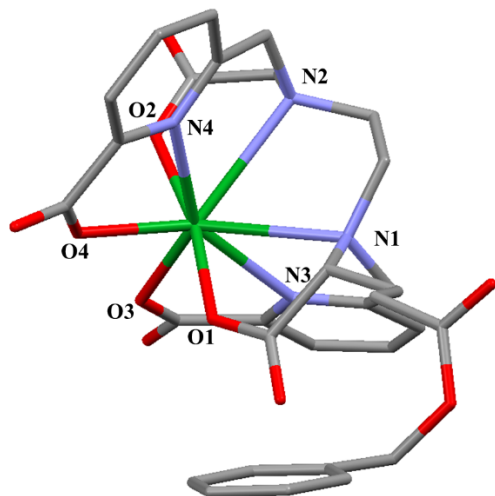

R-DBTA

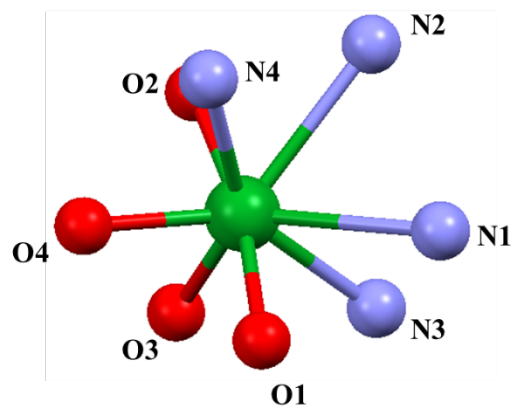

R-DBTA

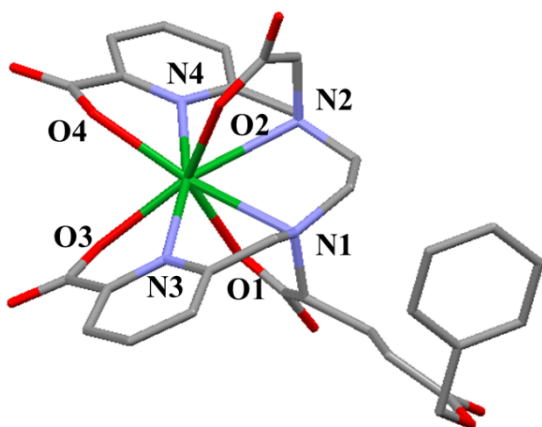

R-DSA

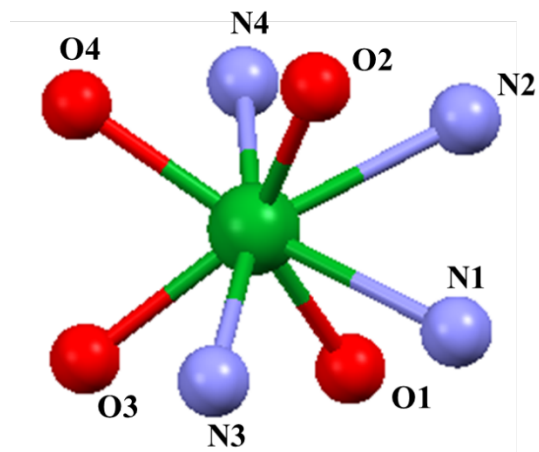

R-DSA

**Figure S27.** DFT-calculated structures of R-DBTA, R-DSA geometries of [Lu(octapa-alkyl-benzyl-ester)]<sup>-</sup>.



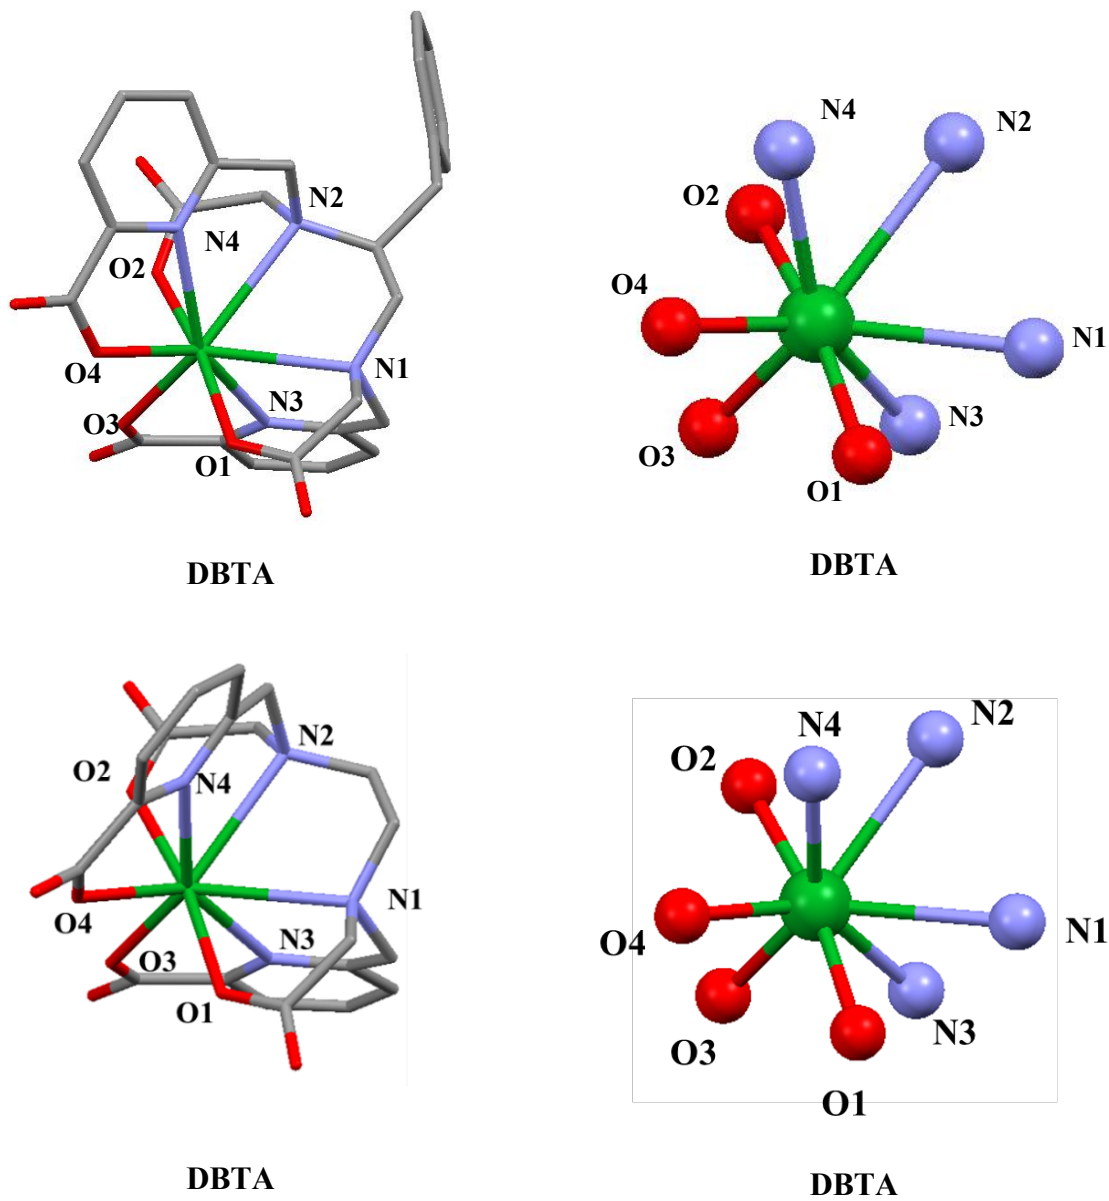

**Figure S28.** DFT-calculated structures for  $[\text{Lu}(\text{S-benzyl-octapa})]^-$  (top) and  $[\text{Lu}(\text{octapa})]^-$  (bottom).

## Radiolabeling, Human Serum Challenge and Lanthanum Competition

**Table S1.** % Intact of [ $^{177}\text{Lu}$ ][Lu(L)] where L = octapa-alkyl-PSMA-ureido and octapa-alkyl-PSMA617 in human serum at 37°C.

| Day  | [ $^{177}\text{Lu}$ ][Lu(octapa-alkyl-PSMA-ureido)] |    | [ $^{177}\text{Lu}$ ][Lu(octapa-alkyl-PSMA617)] |    |
|------|-----------------------------------------------------|----|-------------------------------------------------|----|
|      | % Intact                                            | SD | % Intact                                        | SD |
| 0.04 | 91                                                  | 2  | 91                                              | 8  |
| 1    | 50                                                  | 5  | 18                                              | 10 |
| 3    | 48                                                  | 8  | 12                                              | 5  |
| 7    | 45                                                  | 3  | 4                                               | 1  |

**Table S2.** Radiochemical yield of [ $^{177}\text{Lu}$ ][Lu(L)] where L = octapa-alkyl-PSMA-ureido and octapa-alkyl-PSMA617 at pH=7, 15 min.

| -log[M] | [ $^{177}\text{Lu}$ ][Lu(octapa-alkyl-PSMA-ureido)] |    | [ $^{177}\text{Lu}$ ][Lu(octapa-alkyl-PSMA617)] |    |
|---------|-----------------------------------------------------|----|-------------------------------------------------|----|
|         | RCY %                                               | SD | RCY %                                           | SD |
| 4       | 100                                                 | 0  | 99                                              | 0  |
| 5       | 96                                                  | 3  | 99                                              | 0  |
| 6       | 94                                                  | 1  | 98                                              | 1  |
| 7       | 8                                                   | 4  | 2                                               | 1  |

**Table S3.** Lanthanum competition study of [ $^{177}\text{Lu}$ ][Lu(octapa)]<sup>-</sup> (La:L 0:1 and 3:1).

| Day  | 0:1      |    | 3:1      |    |
|------|----------|----|----------|----|
|      | % Intact | SD | % Intact | SD |
| 0.04 | 99       | 1  | 98       | 0  |
| 1    | 99       | 2  | 88       | 5  |
| 5    | 99       | 1  | 45       | 25 |
| 7    | 99       | 0  | 51       | 14 |

**Table S4.** Lanthanum competition study of [ $^{177}\text{Lu}$ ][Lu(octapa-alkyl-PSMA-ureido)] (La:L 0:1 and 3:1).

| Day  | 0:1      |    | 3:1      |    |
|------|----------|----|----------|----|
|      | % Intact | SD | % Intact | SD |
| 0.04 | 91       | 1  | 60       | 23 |
| 1    | 80       | 2  | 55       | 5  |
| 5    | 79       | 3  | 25       | 5  |
| 7    | 75       | 2  | 17       | 6  |

**Table S5.** Lanthanum competition study of [<sup>177</sup>Lu][Lu(octapa-alkyl-PSMA617)] (La:L 0:1 and 3:1).

| Day  | 0:1      |    | 3:1      |    |
|------|----------|----|----------|----|
|      | % Intact | SD | % Intact | SD |
| 0.04 | 95       | 1  | 96       | 2  |
| 1    | 88       | 5  | 85       | 10 |
| 5    | 57       | 6  | 54       | 18 |
| 7    | 57       | 2  | 39       | 11 |

**Table S6.** Lanthanum competition study of [<sup>177</sup>Lu][Lu(pypa)]<sup>-</sup> (La:L 0:1 and 3:1).

| Day  | 0:1      |    | 3:1      |    |
|------|----------|----|----------|----|
|      | % Intact | SD | % Intact | SD |
| 0.04 | 99       | 0  | 99       | 0  |
| 1    | 99       | 1  | 99       | 0  |
| 5    | 99       | 0  | 97       | 1  |
| 7    | 99       | 0  | 97       | 2  |

**Table S7.** Lanthanum competition study of [<sup>177</sup>Lu][Lu(pypa-C7-PSMA-ureido)] (La:L 0:1 and 3:1).

| Day  | 0:1      |    | 3:1      |    |
|------|----------|----|----------|----|
|      | % Intact | SD | % Intact | SD |
| 0.04 | 99       | 1  | 98       | 3  |
| 1    | 99       | 1  | 93       | 1  |
| 5    | 99       | 0  | 92       | 2  |
| 7    | 99       | 0  | 92       | 2  |

**Table S8.** Lanthanum competition study of [<sup>177</sup>Lu][Lu(pypa-C7-PSMA617)] (La:L 0:1 and 3:1).

| Day  | 0:1      |    | 3:1      |    |
|------|----------|----|----------|----|
|      | % Intact | SD | % Intact | SD |
| 0.04 | 99       | 0  | 99       | 0  |
| 1    | 97       | 0  | 96       | 0  |
| 5    | 99       | 0  | 91       | 4  |
| 7    | 99       | 0  | 86       | 3  |

## Ex Vivo Biodistribution Studies

**Table S9.** *Ex Vivo* biodistribution data of [<sup>177</sup>Lu][Lu(octapa-alkyl-PSMA-ureido)] at different p.i. timepoints (n = 5)..

| Organs           | 1 h    |       | 4 h    |        | 24 h   |       |
|------------------|--------|-------|--------|--------|--------|-------|
|                  | % ID/g | SD    | % ID/g | SD     | % ID/g | SD    |
| <b>Blood</b>     | 0.917  | 0.156 | 0.237  | 0.151  | 0.056  | 0.036 |
| <b>Fat</b>       | 0.512  | 0.090 | 0.494  | 0.430  | 0.375  | 0.295 |
| <b>Seminal</b>   | 3.633  | 4.378 | 0.175  | 0.170  | 0.151  | 0.204 |
| <b>Testes</b>    | 0.502  | 0.167 | 0.225  | 0.060  | 0.099  | 0.069 |
| <b>Intestine</b> | 0.470  | 0.098 | 0.182  | 0.069  | 0.160  | 0.061 |
| <b>Stomach</b>   | 0.106  | 0.034 | 0.102  | 0.040  | 0.486  | 0.878 |
| <b>Spleen</b>    | 9.605  | 5.149 | 3.993  | 2.762  | 1.526  | 1.102 |
| <b>Liver</b>     | 0.377  | 0.044 | 0.235  | 0.092  | 0.425  | 0.431 |
| <b>Pancreas</b>  | 0.624  | 0.117 | 0.333  | 0.143  | 0.755  | 1.334 |
| <b>Adrenal</b>   | 5.828  | 2.605 | 2.969  | 1.830  | 1.168  | 1.040 |
| <b>Kidney</b>    | 74.946 | 9.322 | 59.493 | 14.766 | 49.450 | 4.392 |
| <b>Lung</b>      | 2.006  | 0.514 | 0.941  | 0.184  | 0.450  | 0.193 |
| <b>Heart</b>     | 0.432  | 0.124 | 0.181  | 0.045  | 0.119  | 0.099 |
| <b>Tumor</b>     | 4.917  | 0.881 | 3.446  | 0.954  | 3.800  | 2.203 |
| <b>Muscle</b>    | 0.305  | 0.062 | 0.125  | 0.085  | 0.092  | 0.046 |
| <b>Bone</b>      | 0.561  | 0.111 | 0.667  | 0.382  | 0.623  | 0.230 |
| <b>Brain</b>     | 0.027  | 0.002 | 0.034  | 0.030  | 0.012  | 0.004 |
| <b>Tail</b>      | 0.841  | 0.056 | 0.526  | 0.166  | 0.672  | 0.351 |
| <b>Salivary</b>  | 6.683  | 1.126 | 2.690  | 0.862  | 1.040  | 1.041 |
| <b>Lacrimal</b>  | 0.690  | 0.252 | 0.267  | 0.122  | 0.082  | 0.067 |

**Table S10.** Tumor-to-background ratios of [<sup>177</sup>Lu][Lu(octapa-alkyl-PSMA-ureido)] at different p.i. timepoints (n = 5).

|                     | 1 h   | 4 h   | 24 h  |
|---------------------|-------|-------|-------|
| <b>Tumor/bone</b>   | 8.76  | 5.17  | 6.10  |
| <b>Tumor/muscle</b> | 16.10 | 27.67 | 41.35 |
| <b>Tumor/blood</b>  | 5.36  | 14.55 | 68.20 |
| <b>Tumor/kidney</b> | 0.07  | 0.06  | 0.08  |

**Table S11.** *Ex Vivo* biodistribution data of [<sup>177</sup>Lu][Lu(octapa-alkyl-PSMA617)] different p.i. timepoints (n = 5).

| Organs    | 1 h     |        | 4 h     |        | 24 h   |        |
|-----------|---------|--------|---------|--------|--------|--------|
|           | % ID/g  | SD     | % ID/g  | SD     | % ID/g | SD     |
| Blood     | 1.539   | 0.367  | 0.949   | 0.254  | 0.079  | 0.014  |
| Fat       | 1.405   | 0.760  | 0.810   | 0.662  | 0.133  | 0.086  |
| Seminal   | 0.663   | 0.650  | 0.136   | 0.032  | 0.046  | 0.016  |
| Testes    | 0.810   | 0.230  | 0.600   | 0.242  | 0.143  | 0.048  |
| Intestine | 1.121   | 0.135  | 0.571   | 0.385  | 0.671  | 0.443  |
| Stomach   | 0.205   | 0.080  | 0.527   | 0.765  | 1.427  | 1.494  |
| Spleen    | 24.962  | 13.045 | 6.543   | 7.009  | 2.025  | 1.926  |
| Liver     | 0.630   | 0.161  | 0.496   | 0.142  | 0.450  | 0.079  |
| Pancreas  | 0.879   | 0.253  | 0.494   | 0.296  | 0.082  | 0.018  |
| Adrenal   | 8.030   | 3.379  | 11.140  | 8.293  | 2.972  | 2.048  |
| Kidney    | 143.245 | 17.248 | 183.057 | 51.772 | 26.025 | 10.940 |
| Lung      | 3.586   | 1.502  | 1.829   | 0.888  | 0.354  | 0.052  |
| Heart     | 0.904   | 0.432  | 0.431   | 0.104  | 0.154  | 0.029  |
| Tumor     | 13.468  | 1.080  | 16.994  | 2.042  | 10.721 | 1.275  |
| Muscle    | 0.472   | 0.120  | 0.311   | 0.156  | 0.150  | 0.013  |
| Bone      | 0.643   | 0.285  | 1.330   | 0.568  | 3.617  | 2.061  |
| Brain     | 0.033   | 0.005  | 0.046   | 0.043  | 0.016  | 0.004  |
| Tail      | 1.848   | 0.456  | 1.556   | 0.561  | 1.404  | 0.226  |
| Salivary  | 8.897   | 2.904  | 5.582   | 3.431  | 1.386  | 0.579  |
| Lacrimal  | 0.090   | 0.116  | 0.057   | 0.071  | 0.058  | 0.104  |

  

| Organs    | 72h    |       |
|-----------|--------|-------|
|           | % ID/g | SD    |
| Blood     | 0.014  | 0.006 |
| Fat       | 0.122  | 0.130 |
| Seminal   | 0.034  | 0.014 |
| Testes    | 0.115  | 0.055 |
| Intestine | 0.301  | 0.239 |
| Stomach   | 0.727  | 0.885 |
| Spleen    | 0.586  | 0.242 |
| Liver     | 0.270  | 0.129 |
| Pancreas  | 0.044  | 0.017 |
| Adrenal   | 1.528  | 0.796 |
| Kidney    | 7.221  | 3.433 |
| Lung      | 0.175  | 0.075 |
| Heart     | 0.103  | 0.070 |
| Tumor     | 12.267 | 4.632 |
| Muscle    | 0.114  | 0.069 |
| Bone      | 2.128  | 1.148 |
| Brain     | 0.012  | 0.005 |
| Tail      | 1.251  | 0.650 |
| Salivary  | 0.591  | 0.228 |
| Lacrimal  | 0.053  | 0.050 |

**Table S12.** Tumor-to-background ratios of [<sup>177</sup>Lu][Lu(octapa-alkyl-PSMA617)] at different p.i. timepoints (n = 5).

|                     | <b>1 h</b> | <b>4 h</b> | <b>24 h</b> | <b>72 h</b> |
|---------------------|------------|------------|-------------|-------------|
| <b>Tumor/bone</b>   | 20.94      | 12.78      | 2.96        | 5.76        |
| <b>Tumor/muscle</b> | 28.53      | 54.64      | 71.47       | 107.69      |
| <b>Tumor/blood</b>  | 8.75       | 17.91      | 135.66      | 907.86      |
| <b>Tumor/kidney</b> | 0.09       | 0.09       | 0.41        | 1.70        |
